# Supplementary material
Source: Research Square preprint supplement (doi:10.21203/rs.3.rs-9033981/v1)
Supplement: Supplementary file 1 [file b39482d95375d6af13baa434.docx]

**Online Appendix** **for “Explaining Public Support for Democratic Backsliding in the US, Israel and Germany”**

Table of Contents

[**Online Appendix**  1](#_Toc223379364)

[Table A1: Sample and Population Demographics in Germany, Israel, and the US 2](#_Toc223379365)

[Table A2. IRB Study Approval and Informed Consent; Pre-Registration (aspredicted #142353) 5](#_Toc223379366)

[Pre-Registration, “Support for Democratic Erosion/Backsliding by Partisans in Power (#142353)” 6](#_Toc223379367)

[Figures A1 and A2: V-Dem Ratings of Liberal Democracy and Political Polarization in Germany, Israel, and the US 7](#_Toc223379368)

[Table A3. Survey Items 8](#_Toc223379369)

[Table A3.a. Democratic Backsliding Experiment 8](#_Toc223379370)

[Table A3.b. Measures of Partisan Orientations 11](#_Toc223379371)

[Table A3.c. Measures of Illiberal Affinities 12](#_Toc223379372)

[Table A3.d. Control Variables 13](#_Toc223379373)

[Table A3.e. Demographic Questions 14](#_Toc223379374)

[Table A4. Descriptive Statistics for Variables Used in the Analysis 16](#_Toc223379375)

[Table A5a. Predicting Backsliding Support from Partisan and Illiberal Variables, Complete Results 17](#_Toc223379376)

[Table A5.b. Average Effects of Illiberal Affinities without Treatment Interactions 19](#_Toc223379377)

[Table A6a. Predicting Backsliding Support from Partisan Variables, Together and Separately 20](#_Toc223379378)

[Table A6b. Slopes of Partisan Variables, Estimated Together and Separately 20](#_Toc223379379)

[Figure A3. Graphing the Effects of Partisan Orientations, Based on Model 1, Table 1. 21](#_Toc223379380)

[Figure A4. Distribution of Illiberal Variables across Left and Right in Three Countries 22](#_Toc223379381)

[Table A7. Pairwise Correlations between Illiberal Variables, Populism and Nominal Partisanship 22](#_Toc223379382)

[Table A.8. Effects of Different Measures of Oppose Liberal Democracy on Backsliding Support 23](#_Toc223379383)

[Table A.8a. Comparing Coefficients for Oppose Liberal Democracy after Dropping 1 or 2 Items 23](#_Toc223379384)

[Table A.8b. Full Results Predicting Backsliding with 7- Vs. 5-Item Index of Liberal Democracy 24](#_Toc223379385)

## Table A1: Sample and Population Demographics in Germany, Israel, and the US

| **Germany**: Quota sample (collected by Bilendi) based on age, gender, education (from Statistical office),  Education (based on German Election Study 2021), income (based on Allbus 2021) and region  (based on Bilendi statistical information).   | **Age Category** | **Sample** | **German Statistical Office*** | | --- | --- | --- | | 18-24 | 7.8% | 9.1% | | 25-39 | 23.5% | 22.7% | | 40-59 | 35.9% | 34.8% | | 60-64 | 9.8% | 7.8% | | 65 or above | 25.5% | 25.6% | | **Gender** |  |  | | Male | 48.5% | 48.3% | | Female | 51.5% | 51.7% | | **Education** | **Sample** | **German Pre-Election Study 2021** | | No degree | 1.9% | 2.0% | | Volksschule | 25.6% | 26.0% | | Middle school + polytechnische Oberschule | 33.4% | 34.0% | | Fachhochschul- and Hochschulreife | 23.0% | 22.0% | | University degree | 16.0% | 16.0% | | **Income** | **Sample** | **Allbus Survey 2021** | | Below 500 Euro | 1.5% | 1.7% | | 500-999 | 5.5% | 5.5% | | 1000-1499 | 13.1% | 10.2% | | 1500-1999 | 12.2% | 12.3% | | 2000-2499 | 15.8% | 14.4% | | 2500-2999 | 13.6% | 12.1% | | 3000-3999 | 19.5% | 19.4% | | 4000-4999 | 10.7% | 12.5% | | 5000+ | 7.7% | 15.3% | | **Region** | **Sample** | **Bilendi Demographics** | | West | 79.5% | 84.7% | | East | 20.5% | 15.3% | |
| --- | --- | --- | --- | --- | --- | --- | --- | --- | --- | --- | --- | --- | --- | --- | --- | --- | --- | --- | --- | --- | --- | --- | --- | --- | --- | --- | --- | --- | --- | --- | --- | --- | --- | --- | --- | --- | --- | --- | --- | --- | --- | --- | --- | --- | --- | --- | --- | --- | --- | --- | --- | --- | --- | --- | --- | --- | --- | --- | --- | --- | --- | --- | --- | --- | --- | --- | --- | --- | --- | --- | --- | --- | --- | --- | --- | --- | --- | --- | --- | --- | --- | --- | --- | --- |

**Israel**: Quota sample (collected by iPanel) based on age, gender, education, and religiosity (from Israel Census Data).

| **Age Category** | **Sample** | **Israel Census Data** |
| --- | --- | --- |
| 18-24 | 13.3% | 15% |
| 25-39 | 30.0% | 29% |
| 40-59 | 30.8% | 31% |
| 60 or above | 26.0% | 25% |
| **Gender** |  |  |
| Male | 50.1% | 51% |
| Female | 49.9% | 49% |
| **Education** |  |  |
| Less than high school | 25.1% | 25% |
| High school | 22.0% | 22% |
| Some college | 16.0% | 16% |
| University degree | 22.0% | 22% |
| Graduate degree | 15.0% | 15% |
| **Religiosity** |  |  |
| Haredi; Ultra-Orthodox | 10.7% | 10% |
| Religious | 11.0% | 11% |
| Traditional | 33.0% | 33% |
| Secular; not religious | 45.4% | 45% |

**United States**: Quota sample (collected by Dynata) based on age, gender, education, and race/ethnicity (from 2020 U.S. Census Data).

| **Age Category** | **Sample** | **U.S. Census Data** |
| --- | --- | --- |
| 18-24 | 12.2% | 11% |
| 25-34 | 19.8% | 18% |
| 35-44 | 17.6% | 17% |
| 45-54 | 12.5% | 16% |
| 55-64 | 15.4% | 17% |
| 65 or above | 22.5% | 21% |
| **Gender** |  |  |
| Male | 48.0% | 48% |
| Female | 52.0% | 52% |
| **Education** |  |  |
| Less than high school | 2.6% | 11% |
| High school | 29.0% | 27% |
| Some college | 33.0% | 30% |
| University degree | 23.2% | 20% |
| Graduate degree | 12.2% | 11% |
| **Race/Ethnicity** |  |  |
| White | 63.0% | 63% |
| Black/African American | 12.0% | 12% |
| Hispanic | 16.0% | 16% |
| Asian | 6.0% | 6% |
| Other | 3.0% | 3% |

## Table A2. IRB Study Approval and Informed Consent; Pre-Registration (aspredicted #142353)

Each PI obtained approval for the study from their IRB. Approval certificates will be uploaded with the data set when the manuscript is published. Participants were presented with an informed consent form in the country’s primary language at the start of the online survey that explicitly stated that the survey was part of a research study. Participants had to affirm their consent to participate in the study by clicking an acknowledgment (e.g., "I agree to participate") before proceeding to the survey.  The informed consent form outlined the purpose of the research, the anonymous nature of their participation, the voluntary nature of the study, and their right to withdraw at any time without penalty. The surveys included an experiment where respondents were randomly assigned the conditions described in the main text. No deception was employed.  Finally, each survey institute, which recruited online participants, used anonymized data collection to protect participant identities. The PIs therefore do not have any information about respondents’ identities.

## Pre-Registration, “Support for Democratic Erosion/Backsliding by Partisans in Power (#142353)”


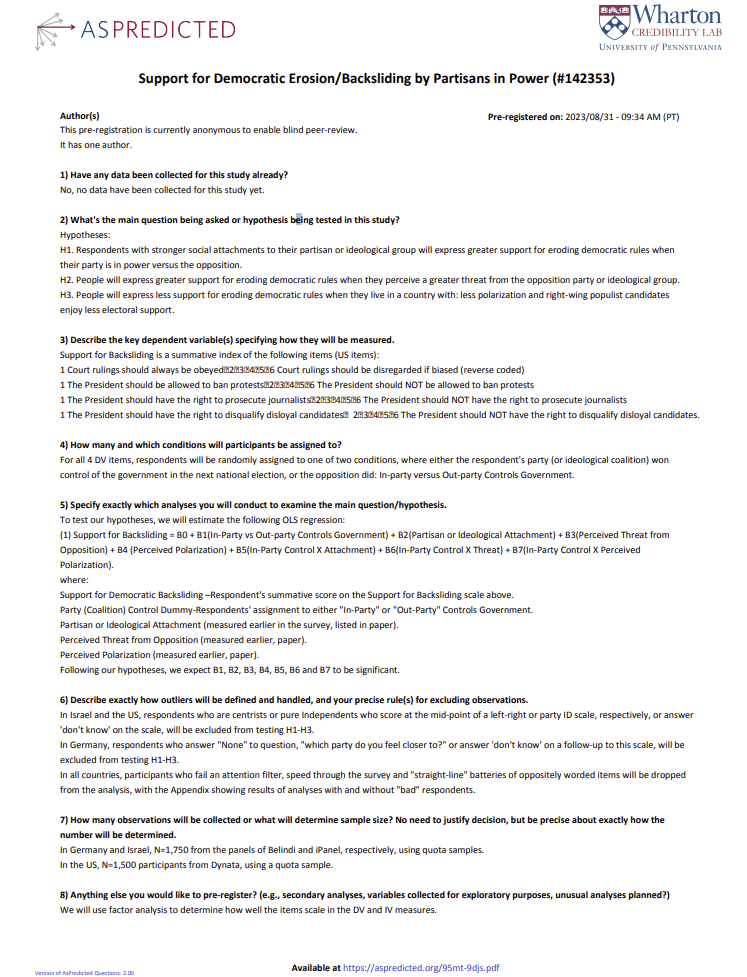


## Figures A1 and A2: V-Dem Ratings of Liberal Democracy and Political Polarization in Germany, Israel, and the US

Liberal democracy Index (v2x_libdem): To what extent is the ideal of liberal democracy achieved? The liberal principle of democracy emphasizes the importance of protecting individual and minority rights against the tyranny of the state and the tyranny of the majority. This is achieved by constitutionally protected civil liberties, strong rule of law, an independent judiciary, and effective checks and balances that, together, limit the exercise of executive power. The index also takes the level of electoral democracy into account.

Political polarization (v2cacamps): Is society polarized into antagonistic, political camps reluctant to engage in friendly interactions, for example, in family functions, civic associations, their free time activities and workplaces? *Responses:* 0) Not at all; supporters of opposing political camps generally interact in a friendly manner; 1) Mainly not. 2) Somewhat. 3) Yes, to noticeable extent. 4) Yes, to a large extent. Supporters of opposing political camps generally interact in a hostile manner. *Data release:* 10-15. Coppedge, Michael, et al. 2025. "V-Dem Codebook v15" Varieties of Democracy (V-Dem) Project.

## Table A3. Survey Items

### Table A3.a. Democratic Backsliding Experiment

Vignettes used in the USA (fall 2023), Israel (fall, pre-October 7, 2023) and Germany (fall 2023).

In each country, respondents were first randomly assigned to either a liked (in-party or bloc) versus a disliked (out-party or bloc) vignette, based on their prior identification with parties or blocs (see Nominal Party or Bloc items). Then they were asked four questions assessing their support for democratic backsliding, or the erosion of democratic norms. Below we describe the vignette design in each country.

**US**

“For the next few questions, imagine that it's 2024 and the (randomly assigned: **Democrats/Republicans**) have won the presidency and the majority in Congress.” Respondents evaluated the following four backsliding policy proposals on a 6-point scale ranging from 1 (strong support for the first option) to 6 (strong support for the second option). The first policy (below) violates the principle of judicial independence, while the remaining policies (2-4) violate civil liberties.

(1) “The newly-elected **[Democrats/Republicans]** are questioning the impartiality of the U.S. Supreme Court, with several suggesting some Court rulings should be disregarded if they are biased against the government. Rate how strongly you feel court rulings should either **be obeyed or disregarded.”**

(2) “The newly elected **[Democrats/Republicans]** must decide how to handle growing protests against the government in the country. Rate how strongly you feel the President should or should not **be allowed to ban protests.”**

(3) “The new **[Democratic/Republican]** President is pushing to prosecute journalists who accuse the President of misconduct without revealing sources. Rate how strongly you feel the President should or should not have the **right to prosecute these journalists.”**

(4) “To protect the country, the **[Democratic/Republican]** President wants to **disqualify candidates who are disloyal [[1]](#footnote-1)**to the country from running for national office. Rate how strongly you feel the President should or should not have the **right to disqualify disloyal candidates.”**

When a respondent receives the Democratic/Republican Party treatment *and* identifies with that party (party identification is asked earlier in the survey), we call this the ***in-party treatment*** (coded 0),where therespondent evaluates the four proposed policies when they are offered by the party they identify with. When the respondent receives the ***out-party treatment*** (coded 1)*,* their partisanship does not match the party who reportedly won the election, meaning the respondent evaluates whether they support the four policies offered by the opposition party.[[2]](#footnote-2)

Based on responses to the four questions in the surveys, we created a summary index, *Backsliding Support*, and rescaled it to range from 0 (no support for backsliding) to 1 (strong support for backsliding).

**Israel**

Because political parties come and go in Israel’s multi-party system (Oshri, Yair, and Huddy 2022), we referred to a right-bloc and a left-center bloc in the vignettes.

*The (randomly assigned) right-wing vignette reads*:

“For the next few questions, imagine the current right-wing coalition did not succeed in its judicial reform. It's 2026, and in the next regularly scheduled election, the **right-bloc coalition** has increased their majority in the Knesset.

*The (randomly assigned) center-left vignette reads*:

“For the next few questions, imagine the current right-wing coalition did not succeed in its judicial reform. It's 2026, and in the next regularly scheduled election, the **left-center bloc coalition** has won a majority in the Knesset.”

Then, respondents evaluated four scenarios:

1. In this scenario, the newly-elected **[left-center/right government]** is questioning the **impartiality of the Supreme Court**, with several government ministers suggesting some Court rulings should be **disregarded if they are biased** against the government.
    Rate how strongly you feel court rulings should either **be obeyed or disregarded** by choosing any number between 1 to 6 on the scale below.
2. Now, the newly elected **government** must decide how to **handle growing protests** against the government in the country. Rate how strongly you feel the government should or should not **be allowed to ban protests**, by choosing any number between 1 to 6 on the scale below.
3. Now, the new government is **pushing to prosecute journalists** who accuse the government of misconduct without revealing sources.
    Rate how strongly you feel the government should or should not have the **right to prosecute these journalists**, by choosing any number between 1 to 6 on the scale below.
4. Once more, imagine it's 2026, and in the election, the **[left-center/right bloc] coalition** has won a majority in the Knesset.
    To protect the country, the government now wants to **disqualify candidates whom it deems to be disloyal**to the country from running for national office.
    Rate how strongly you feel the government should or should not have the **right to disqualify disloyal candidates**, by choosing any number between 1 to 6 on the scale below.

When a respondent receives the right-bloc coalition/left-center bloc coalition vignette *and* identifies with that bloc (assessed earlier in the survey), we call this the ***in-bloc treatment*** (coded 0), where the respondent evaluates the four proposed policies when they are offered by the bloc they identify with. When the respondent receives the ***out-bloc treatment*** (coded 1)*,* their political identity does not match the bloc that reportedly won the election, meaning the respondent evaluates whether they support the four policies offered by the opposition bloc.[[3]](#footnote-3)

Based on the responses to the four questions in the surveys, we created a summary index, *Backsliding Support*, and rescaled it to range from 0 (no support for backsliding) to 1 (strong support for backsliding).

**Germany**

Because Germany’s multi-party system does not fit neatly into two party blocs like the Israeli system, one cannot simply assume the out-party (or bloc) is the opposite of the in-party (or bloc). Therefore, early in the German survey, we asked respondents not only which ***party they identify with*** (**In-Party**) but subsequently also which ***party they* *like the least***(**Out-Party**). Then, in the introduction to the Backsliding Experiment later in the survey, respondents were randomly assigned to be asked about either the In-Party (the party the respondent identifies with) or the Out-Party (the party the respondent likes the least), both of which are described as playing an important role in the newly elected government:

“For the next few questions, imagine that it's 2025 and after the next regularly scheduled election the newly elected government includes the **[In-Party/Out-Party]** party, which plays an **important role in the governing coalition**.”

Then, respondents evaluate the same statements and response categories used in the US survey:

1. “In this scenario, the newly-elected **government** is questioning the **impartiality of the Constitutional Court**, with several government ministers suggesting some Court rulings should be **disregarded if they are biased** against the government. Rate how strongly you feel court rulings should either **be obeyed or disregarded.”**
2. “Now, the newly elected government must decide how to **handle growing protests** against the government in the country. Rate how strongly you feel the government should or should not **be allowed to ban protests**.”
3. “Again, imagine the **[In-party/Out-party]** party plays an important role in the governing coalition after the 2025 elections. In this scenario, the new government is **pushing to prosecute journalists** who accuse the government of misconduct without revealing sources. Rate how strongly you feel the government should or should not have the **right to prosecute these journalists.”**
4. “To protect the country, the government now wants to **disqualify candidates whom it deems to be disloyal**to the country from running for office. Rate how strongly you feel the government should or should not have the **right to disqualify disloyal candidates.”**

When a respondent receives the **In-party** vignette *and* identifies with that party (assessed earlier in the survey), we call this the ***in-party treatment*** (coded 0), where the respondent evaluates the four proposed policies when they are offered by a government that includes the party they **identify with**. When the respondent receives the ***out-party treatment*** (coded 1)*,* the respondent evaluates whether they support the four policies offered by a government that includes the party they **like the least**.[[4]](#footnote-4)

Based on the responses to the four questions in the surveys, we created a summary index, *Backsliding Support*, and rescaled it to range from 0 (no support for backsliding) to 1 (strong support for backsliding).

### Table A3.b. Measures of Partisan Orientations

**Nominal Partisanship or Left-Right**

Early in the survey, respondents in all three countries indicated the party or bloc they identify with. For the two-party system of the US and the left and right identity groups of Israel, this information was used to determine respondents’ in-party (or bloc) and their out-party (or bloc). In Germany, in-partisans were categorized into three left-right blocs: Left bloc (0=SPD, Bündnis 90/Die Grünen, Die Linke), Right-Moderate bloc (1=CDU/CSU, FDP) and Right (AfD).

**Specifically, in the US**, people were asked the traditional 7-point party identification question, with the usual follow-up item. “Generally speaking, do you think of yourself as a…?” Strong Democrat (1) Not very strong Democrat (2) Lean Democrat (3) Independent (4) Lean Republican (5) Not very strong Republican (6) Strong Republican (7) Not sure (8).

For Independents and not sure respondents, we followed-up by asking, “Do you think of yourself as closer to the Democratic Party or to the Republican Party?” Pure Independents were dropped because our hypotheses only apply to partisans. *Nominal Party Label* was coded as either Democrat (coded 0=58%) or Republican (coded 1=42%).

**In Israel**, where political parties come and go, Jewish respondents were asked, “With what political tendency do you identify?” Left (1) Moderate left (2) Center (3) Moderate right (4) Right (5) Not sure (6).

For centrists and not sure respondents, we followed-up by asking, “Do you think of yourself as closer to the Left or the Right?” Pure Centrists (12%) were dropped. *Nominal Bloc Label* was coded as either Left (coded 0=23%) or Right (coded 1=77%).

**In Germany**, respondents were first asked which party they identified with through two prompts (**“**Do you usually think of yourself as close to any particular party? If so, which one?” Respondents were shown a list of six German parties: CDU/CSU (1), SPD (2), AfD (3), FDP (4), Die Linke (5), Bündnis 90/Die Grünen (6), Other party (7).For respondents who did not mention a party in the first question, a follow-up probed, “Do you feel yourself a little closer to one of the political parties than the others?” Respondents again were shown the list of six German parties**.**

*Nominal Bloc Label* in Germany was coded as Left bloc (coded 0, 43.42%=SPD, Bündnis 90/Die Grünen, Die Linke), Right-Moderate bloc (coded 1, 34.17%= CDU/CSU, FDP) and Right bloc (coded 2, 22.40%=AfD).

**Partisan (Left-Right) Social Identities**

After gauging party identities in Germany and the US and left-right identities in Israel, the following items were used to assess *Partisan (Left-Right) Social Identities*:

1. How important is being [party/leftists/rightists] to you? (1. Not at all important to 4. Extremely important).
2. When people criticize [party/leftists/rightists], it feels like a personal insult.
3. When I meet someone who supports [party/leftists/rightists], I feel connected.
4. When people praise [party/leftists/rightists], it makes me feel good.

Response options for items 2 to 4 are: 1. Strongly agree to 5. Strongly disagree. The 4-item additive index is coded from low social identity (0) to high social identity (1). Alphas range from .83 (US) to .82 (Israel) to .79 (Germany). In the US, the [party] is either “the Democratic Party” or “the Republican Party;” in Israel, it is either “leftists” or “rightists;” in Germany, it is one of six parties the respondent identifies with.

**Perceived Opposition Threat**

How much do you agree or disagree that the rhetoric and policies of **[the** **opposition]** are so misguided they:

1. Threaten our way of life?

2. Threaten the country’s democracy?

3. Threaten the country’s existence?

Response options are: 1. Strongly agree to 5. Strongly disagree. The resulting additive index, Opposition Threat, is recoded to range from 0 (low threat) to 1 (high threat). Alphas range from .91 (US) to .93 (Israel) to .90 (Germany). In the US, the opposition is either “the Democratic Party” or “the Republican Party;” in Israel it is either “the left-center bloc” or “the right bloc;” in Germany it is [the least-liked party] selected with the following question, “Which party do you like the **least**?” using a list of German parties: CDU/CSU (1), SPD (2), AfD (3), FDP (4), Die Linke (5), Bündnis 90/Die Grünen (6), Other party (7), None (10).

### Table A3.c. Measures of Illiberal Affinities

**Opposition to Liberal Democracy** (Questions corresponding to Claassen et al. (2024) conceptualization)

Principle Question (Claassen et al. item label is in bold)

**Freedom of expression**

1. The government should be able to censor media sources that are too critical.
   (**FreeExp2**; included in Claassen et al.’s (2024) 7-item index)
2. I believe in free speech for all no matter what their views might be. (-)

**Freedom of association**

1. The government should have the power to ban organizations that promote [un-American/ anti-Zionist/un-German] values. (**FreeAssc3**)

**Universal suffrage**

1. All adult [U.S./Israeli/German] citizens should have the right to vote, even individuals holding extreme views. (**UniSuff2**) (-)

**Free and fair elections**

1. We should respect the results of elections, no matter which candidate wins. (**FFElect1**) (-)
2. People in the minority should be free to try to win majority support for their opinions. (-)

**Equality before the law**

1. No matter what a person's political beliefs are, they are entitled to the same legal rights and protections as anyone else (~**EqLaw2**). (-)

Response options for all items are: 1. Strongly agree, 2. Agree, 3. Neither agree nor disagree, 4. Disagree, 5. Strongly disagree. “(-)” indicates responses were reverse coded. The *Opposition to Liberal Democracy* index is coded on a 0 to 1 scale with higher values indicating more opposition to liberal democracy. Alphas range from .65 (US) to .58 (Israel) to .58 (Germany). None of our items tap the following principles: “key decision-makers being elected,” “judicial constraints” “equality before the law,” or “legislative constraints on the executive.” Claassen et al. dropped the items for “key decision-makers,” and we omitted a “judicial constraints” item to avoid overlap with the “disregard the Court” item in the Backsliding Experiment.

**Support for Authoritarian Governance**

For each type of political system, rate how well you think it would be for governing this country on a 4-point scale ranging from “very good, fairly good, fairly bad, or very bad.”

1. Having the army rule?
2. Having a strong leader who does not have to bother with [Congress/the Knesset/the Bundestag] and elections?

The *authoritarian governance* index ranges from 0 (low support) to 1 (high support). The correlations between the two items are .53 (US), .45 (Israel) and .48 (Germany).

**Ethno-Nationalism**

How important do **you** think each of these **characteristics** are for being truly[**American/ Israeli/German]**?” on a 4-point scale ranging from “Not at all important(1), Slightly important(2), Moderately important(3), Very important(4).”

To have been born in [Country]?

To have [American ancestry/Jewish ancestors/German ancestors]?

To be [Christian/Christian/a religious Jew]?

Additional ethnic antagonism item in each country:

**US, Anti-Black Prejudice**: formed by subtracting thermometer ratings of “Black people” from those of “White people.” Thermometer ratings from 1 (Very Unfavorable) to 7 (Very Favorable) are recoded from 0 to 1.

**Israel, Threat from Arab Citizens of Israel**: “To what extent do you feel Arab citizens of Israel pose a threat to the Jewish identity of Israel.” 1. Not at all threatening to 5. Very threatening.

**Germany, Antisemitism**: For each statement about **Jews**, please indicate whether you think it is likely **true** or likely to be **false**. “Jews still talk too much about what happened to them in the Holocaust.” (1. Definitely false, 2. Probably false, 3. Neither true nor false, 4. Probably true, 5. Definitely true).

All 4 items were coded from 0 to 1 and then added to an index scored from 0 (low ethno-nationalism) to 1 (high ethno-nationalism). Alphas are .73 (US), .66 (Israel) and .69 (Germany).

### Table A3.d. Control Variables

**Populism**

1. What people call “compromise” in politics is really just selling out on one’s principles.
2. The ordinary people, not the elites, should always have the final say in politics.
3. When it comes to making policy decisions, ordinary people should be trusted more than so-called experts.
4. Politics is ultimately a struggle between good and evil.

Response options are: 1. Strongly disagree, 2. Disagree, 3. Neither agree nor disagree, 4. Agree, 5. Strongly agree. Alphas range from .64 (US), .59 (Israel), to .75 (Germany).

**Conservative Social Policy**

1. Gay men and lesbian couples should have the same rights to adopt children as straight couples. (-)
2. Abortion should be illegal in most cases
3. The government should make an effort to return refugees to their country as soon as possible.

Response options are: 1. Strongly disagree, 2. Disagree, 3. Neither agree nor disagree, 4. Agree, 5. Strongly agree. “(-)” indicates responses were reverse coded. We created an additive index and rescaled it to range from 0 (indicating a left social preference) to 1 (a conservative social preference). Alphas range from .59 (US), .58 (Israel), to .44 (Germany).

**Economic Performance**

1. How would you rate the general **economic situation in COUNTRY -** over the **last half year**, has it become…?
2. What about your **personal** economic situation - over the **last half year**, has it become…?

Responses were coded as Much better (1), A little better (2), Remained the same (3), A little worse (4), Much worse (5)? Responses were summed into an index and rescaled to range from 0 (much better economic conditions) to 1 (much worse). Correlations range from .62 (US) to .47 (Israel) to .44 (Germany).

**Political Engagement**

Respondents were asked whether they participated in a demonstration or worked or volunteered for a party in an election campaign (Yes=1, No=0). We created an additive index and rescaled it to range from 0 (no engagement) to 1 (engaged).

### Table A3.e. Demographic Questions

**Age**

Based on the year of birth, we recoded age into 6 categories: 18-24, 25-34, 35-44, 45-54, 55-64, and 65+.

**Education**

We created a five-point variable ranging from 0 reflecting “no degree “ to 1 denoting an MA or higher degree, with intermediate degrees coded in-between. The variable is based on the following country-specific questions:

**Germany**

“What is your highest educational degree?”

1. Finished school without school leaving certificate
2. Lowest formal qualification of Germany’s tripartite secondary school system, after 8 or 9 years of schooling
3. Intermediary secondary qualification, after 10 years of schooling
4. Certificate fulfilling entrance requirements to study at a polytechnical college (4)
5. Higher qualification, entitling holders to study at a university (5)
6. Specialized college degree (6)
7. Advanced college degree (7)
8. Other school leaving certificate, please enter:

**Israel**

“What is your highest educational degree?”

1. Elementary school or less
2. High school without matriculation
3. High school with matriculation certificate
4. Post-high school with no academic degree (e.g. technical education)
5. BA
6. MA or above

**USA**

“What is the highest level of education you have completed?”

1. Less than high school
2. High school graduate
3. Some college
4. 2-year degree
5. 4-year degree
6. Professional degree
7. Doctorate

**Gender**

Female coded 1; Male coded 0.

**Income**

Based on the country-specific income questions, we created a common variable, ranging from 0 (denoting income levels far below the average) to 1 (representing income levels far above the average), with the remaining three categories denoting intermediary levels (below average, average, above average).

Country specific questions are:

**Germany:**

**“**How high is YOUR HOUSEHOLD'S TOTAL net monthly income in terms of the amount remaining after tax and other deductions?”

Less than 500 euros (1)

500 to less than 750 euros (2)

750 to less than 1000 euros (3)

1000 to less than 1250 euros (4)

1250 to less than 1500 euros (5)

1500 to less than 2000 euros (6)

2000 to less than 2500 euros (7)

2500 to less than 3000 euros (8)

3000 to less than 4000 euros (9)

4000 to less than 5000 euros (10)

5000 to less than 7500 euros (11)

7500 to less than 10000 euros (12)

10000 euros or more (13)

Prefer not to answer (14)

**Israel:**

“The average gross income per household is NIS 16,000 per month. How does your household income compare?”

1. Far below average
2. A little below average
3. Similar to average
4. A little over average
5. Far above average

**USA**

**“What is your approximate annual household income? “**

**Less than $10,000 (1)**

**$10,000 - $19,999 (2)**

**$20,000 - $29,999 (3)**

**$30,000 - $39,999 (4)**

**$40,000 - $49,999 (5)**

**$50,000 - $59,999 (6)**

**$60,000 - $69,999 (7)**

**$70,000 - $79,999 (8)**

**$80,000 - $89,999 (9)**

**$90,000 - $99,999 (10)**

**$100,000 - $149,999 (11)**

**More than $150,000 (12)**

**Prefer not to say (13) Recoded to mean**

**Race/Ethnicity (US Only)**

What racial or ethnic group best describes you?

- White (0)
- Black or African American (1)
- Hispanic or Latino (2)
- Asian or Asian American or Pacific Islander (3)
- Other (4)

## Table A4. Descriptive Statistics for Variables Used in the Analysis

Note: The range of all variables is 0 to 1, unless otherwise noted. *Range is 0, 1. **Range is 0, 1 2.

## Table A5a. Predicting Backsliding Support from Partisan and Illiberal Variables, Complete Results

Note: *p < .05, **p < .01. The results include coefficients for race/ethnicity (US) and family income.

## Table A5.b. Average Effects of Illiberal Affinities without Treatment Interactions

| **Illiberal Affinities** | **US** | **Israel** | **Germany** |
| --- | --- | --- | --- |
| Opposition to Lib Democracy | .35** (.04) | .49** (.04) | .49** (.04) |
| Authoritarian Governance | .16** (.02) | .15** (.02) | .16** (.03) |
| Ethno-Nationalism | .16** (.02) | .11** (.03) | .14** (.02) |

**Note:** *p<.05, **p<.01. Entries are OLS coefficients with standard errors in parentheses. All

variables coded to 0 to 1 scale.

## Table A6a. Predicting Backsliding Support from Partisan Variables, Together and Separately

|  | **Model1, Table 1** | | | **Opposition Threat Only** | | | **Partisan Social ID Only** | | |
| --- | --- | --- | --- | --- | --- | --- | --- | --- | --- |
|  | USA | Israel | Germany | USA | Israel | Germany | USA | Israel | Germany |
| **Partisan Vars** |  |  |  |  |  |  |  |  |  |
| Opposition Threat | .02 | .17** | -.04 | .08** | .24** | -.02 |  |  |  |
|  | (.03) | (.03) | (.03) | (.03) | (.03) | (.03) |  |  |  |
| Treatment | .09* | .14** | .10* | .07* | .11** | .06 |  |  |  |
|  | (.04) | (.04) | (.04) | (.03) | (.04) | (.04) |  |  |  |
| Treat ***x*** Oppos Thrt | -.18** | -.16** | -.10* | -.21** | -.20** | -.11* |  |  |  |
|  | (.04) | (.04) | (.04) | (.04) | (.04) | (.04) |  |  |  |
| Partisan Social ID | .24** | .23** | .10* |  |  |  | .26** | .31** | .11** |
|  | (.04) | (.04) | (.04) |  |  |  | (.04) | (.04) | (.04) |
| Treat ***x*** Social ID | -.08 | -.11* | -.10* |  |  |  | -.14** | -.19** | -.09 |
|  | (.05) | (.05) | (.05) |  |  |  | (.05) | (.05) | (.05) |
| Nominal Partisan | -.01 | .17** | .01 | -.02 | .18** | .01 | -.00 | .12** | .01 |
|  | (.02) | (.02) | (.01) | (.02) | (.02) | (.01) | (.02) | (.02) | (.01) |
| Treat ***x*** Nominal | -.02 | -.03 | -.05** |  |  | -.05** | -.03 | .01 | -.05** |
|  | (.02) | (.03) | (.01) |  |  | (.01) | (.02) | (.02) | (.01) |
| **Control Vars** |  |  |  |  |  |  |  |  |  |
| Soc Conserv | .15** | .18** | .14** | .19** | .19** | .14** | .15** | .19** | .14** |
|  | (.02) | (.03) | (.03) | (.02) | (.03) | (.03) | (.03) | (.03) | (.03) |
| Populism | .18** | .30** | .22** | .21** | .32** | .24** | .16** | .31** | .22** |
|  | (.03) | (.03) | (.03) | (.03) | (.03) | (.03) | (.03) | (.03) | (.03) |
| Past Econ Worse | -.05* | -.14** | -.07* | -.08** | -.17** | -.08** | -.06** | -.15** | -.07** |
|  | (.02) | (.03) | (.03) | (.02) | (.03) | (.03) | (.02) | (.03) | (.03) |
| Pol Engagement | -.13** | -.12** | -.14** | -.09** | -.08** | -.13** | -.14** | -.11** | -.16** |
|  | (.02) | (.02) | (.03) | (.02) | (.02) | (.03) | (.02) | (.02) | (.03) |
| Age(5cat) | -.16** | -.04* | -.03 | -.15** | -.04* | -.04* | -.16** | -.04* | -.04* |
|  | (.02) | (.02) | (.02) | (.02) | (.02) | (.02) | (.02) | (.02) | (.02) |
| Female(=1) | .05** | .06** | .07** | .05** | .07** | .07** | .05** | .07** | .07** |
|  | (.01) | (.01) | (.01) | (.01) | (.01) | (.01) | (.01) | (.01) | (.01) |
| Education(5cat) | -.07** | -.03 | -.08** | -.07** | -.04* | -.09** | -.07** | -.03 | -.09** |
|  | (.02) | (.02) | (.02) | (.02) | (.02) | (.02) | (.02) | (.02) | (.02) |
| Constant | .27** | -.05 | .38** | .32** | .01 | .40** | .30** | .04 | .35** |
|  | (.04) | (.04) | (.05) | (.04) | (.04) | (.04) | (.03) | (.04) | (.04) |
| N | 1370 | 1329 | 1569 | 1370 | 1329 | 1569 | 1371 | 1329 | 1569 |
| Adj-R2 | .27 | .44 | .17 | .24 | .43 | .18 | .26 | .43 | .17 |

Note: Entries are OLS coefficients with standard errors in parentheses. †p < 10., *p < .05, **p < .01. Model 1 omits the Illiberal Affinity variables and includes all three Partisan Variables and their interactions with the Treatment. All variables coded to 0 to 1 scale. Small and insignificant coefficients for Family Income, Race/Ethnicity (US only), and Religiosity (Israel only) are not shown.

In the Appendix Table above, we compare estimates of backsliding support when the two major partisan orientations—Opposition Threat and Partisan Social Identity—are entered together, as they are in Model 1 of Table 1 of the text, or separately. Overall, the results do not differ appreciably across specifications.

In Table A6B below, we compare the slopes of the two partisan variables estimated together and separately.

## Table A6b. Slopes of Partisan Variables, Estimated Together and Separately

| Slopes of Partisan Variables | Together  (US) | Separately (US) | Together  (Israel) | Separately (Israel) | Together  (Germany) | Separately (Germany) |
| --- | --- | --- | --- | --- | --- | --- |
| Oppos Threat |  |  |  |  |  |  |
| In-Party | .02 | .08** | .17** | .24** | -.04 | -.03 |
| Out-Party | -.16** | -.13** | .02 | .04 | -.14** | -.14** |
| Pol. Soc ID |  |  |  |  |  |  |
| In-Party | .24** | .26** | .23** | .31** | .10** | .10** |
| Out-Party | .16** | .11** | .12** | .12** | .01 | .01 |

Note: *p < .05, **p < .01. Slopes Estimated Together are based on the coefficients of Model 1, Table 1. (Also see Figure A4). Slopes Estimated Separately are based on the coefficients of Table A6A.

## Figure A3. Graphing the Effects of Partisan Orientations, Based on Model 1, Table 1.

## Figure A4. Distribution of Illiberal Variables across Left and Right in Three Countries

## Table A7. Pairwise Correlations between Illiberal Variables, Populism and Nominal Partisanship

| **USA** |  | LibDemoc | AuthorGov | EthnoNat'ism | Populism | Partisanship |
| --- | --- | --- | --- | --- | --- | --- |
|  | Lib Democ | 1.00 |  |  |  |  |
|  | Author Gov | 0.45 | 1.00 |  |  |  |
|  | EthnoNat'ism | 0.34 | 0.44 | 1.00 |  |  |
|  | Populism | 0.15 | 0.38 | 0.36 | 1.00 |  |
|  | Partisanship | 0.07 | 0.08 | 0.27 | 0.16 | 1.00 |
| **Israel** |  |  |  |  |  |  |
|  | Lib Democ | 1.00 |  |  |  |  |
|  | Author Gov | 0.41 | 1.00 |  |  |  |
|  | EthnoNat'ism | 0.32 | 0.29 | 1.00 |  |  |
|  | Populism | 0.34 | 0.49 | 0.35 | 1.00 |  |
|  | Left-Right ID | 0.26 | 0.21 | 0.49 | 0.29 | 1.00 |
| **Germany** |  |  |  |  |  |  |
|  | Lib Democ | 1.00 |  |  |  |  |
|  | Author Gov | 0.27 | 1.00 |  |  |  |
|  | EthnoNat'ism | 0.19 | 0.42 | 1.00 |  |  |
|  | Populism | 0.10 | 0.41 | 0.38 | 1.00 |  |
|  | Partisanship | 0.03* | 0.34 | 0.35 | 0.43 | 1.00 |

*p>.05

## Table A.8. Effects of Different Measures of Oppose Liberal Democracy on Backsliding Support

As pointed out in the text (Footnote 17, p. 26), it could be argued that two of the liberal democracy items—media censorship and ban organizations—overlap with two of the backsliding items, prosecute journalists and ban protests, respectively. The results in the tables below show that even if we summarily drop one or both items from the liberal democracy index, although the effects of liberal democracy shrink, they remain the strongest predictors of backsliding for all three countries.

Specifically, in **Table A.8a**, we compare the effects of opposing liberal democracy on backsliding support across four different measures—the 7-item index versus dropping one or both measures from the index. In **Table A.8b**, we compare the full results for Model 2 reported in the main text (Table 1, p. 24) to a Model 3 that includes the 5-item liberal democracy index to show that the liberal democracy scale remains the strongest predictor of backsliding for all three countries.

### Table A.8a. Comparing Coefficients for Opposing Liberal Democracy after Dropping 1 or 2 Items

**Measure US Israel Germany**

Oppose Liberal Democracy scale (7-item) .39** .47** .45**

6-item scale, dropping ban groups .29** .41** .38**

6-item scale, dropping censor media .36** .33** .36**

5-item scale, dropping ban & censor .23** .26** .26**

Note: Reported coefficients are for the In-Party condition.

### Table A.8b. Full Results Predicting Backsliding with 7-Item Vs. 5-Item Index of Liberal Democracy

**Model 2 (7-items) Model 3 (5-items)**

| **Partisan Orientations** | US | Israel | Germany | US | Israel | Germany |
| --- | --- | --- | --- | --- | --- | --- |
| Opposition Threat | .09** | .16** | .01 | .08** | .17** | .01 |
|  | (.03) | (.03) | (.03) | (.03) | (.03) | (.03) |
| Treatment (In-/Out-Party) | .10** | .15** | .10* | .10** | .16** | .13* |
|  | (.04) | (.04) | (.05) | (.04) | (.04) | (.05) |
| *Treatment* ***x*** *Opposition Threat* | -.18** | -.16** | -.13** | -.17** | -.16** | -.12** |
|  | (.04) | (.04) | (.04) | (.04) | (.04) | (.04) |
| Partisan (L-R) Social ID | .10** | .20** | .06 | .13** | .21** | .06 |
|  | (.04) | (.04) | (.04) | (.04) | (.04) | (.04) |
| *Treatment* ***x*** *Partisan Social ID* | -.09 | -.12* | -.10* | -.11* | -.11* | -.09 |
|  | (.05) | (.05) | (.05) | (.05) | (.05) | (.05) |
| Nominal Partisanship (L-R) | -.02 | .12** | .01 | -.03 | .13** | -.00 |
|  | (.02) | (.02) | (.01) | (.02) | (.02) | (.01) |
| *Treatment* ***x*** *Nominal Partisanship* | -.01 | -.01 | -.05** | -.01 | -.01 | -.05** |
|  | (.02) | (.03) | (.01) | (.02) | (.03) | (.01) |
| **Illiberal Affinities** |  |  |  |  |  |  |
| Oppose Liberal Democracy | .39** | .47** | .45** | .23** | .26** | .26** |
|  | (.06) | (.06) | (.05) | (.05) | (.05) | (.05) |
| *Treatment* ***x*** *Oppose Liberal Democracy* | -.08 | .05 | .10 | -.10 | .07 | -.01 |
|  | (.08) | (.09) | (.08) | (.07) | (.07) | (.07) |
| Authoritarian Governance | .13** | .14** | .15** | .17** | .18** | .18** |
|  | (.03) | (.03) | (.04) | (.03) | (.03) | (.04) |
| *Treatment x Authoritarian Governance* | .06 | .02 | .03 | .06 | .00 | .04 |
|  | (.04) | (.04) | (.05) | (.04) | (.04) | (.05) |
| Ethno-Nationalism | .16** | .15** | .16** | .18** | .17** | .19** |
|  | (.03) | (.04) | (.03) | (.03) | (.04) | (.03) |
| *Treatment x Ethno-Nationalism* | -.00 | -.08 | -.04 | .01 | -.07 | -.04 |
|  | (.04) | (.05) | (.04) | (.04) | (.05) | (.05) |
| **Control Variables** |  |  |  |  |  |  |
| Social Conservatism | -.00 | .13** | -.03 | .01 | .13** | -.01 |
|  | (.02) | (.03) | (.03) | (.03) | (.03) | (.03) |
| Populism | .07* | .10** | .09** | .07* | .13** | .11** |
|  | (.03) | (.03) | (.03) | (.03) | (.03) | (.03) |
| Past Economic Perf (Worse) | .01 | -.13** | -.03 | -.01 | -.14** | -.04 |
|  | (.02) | (.02) | (.03) | (.02) | (.03) | (.03) |
| Pol Engagement | -.07** | -.08** | -.09** | -.08** | -.08** | -.11** |
|  | (.02) | (.02) | (.03) | (.02) | (.02) | (.03) |
| Age | -.10** | -.02 | -.00 | -.11** | -.02 | -.00 |
|  | (.02) | (.02) | (.02) | (.02) | (.02) | (.02) |
| Female | .03** | .03** | .05** | .03** | .04** | .06** |
|  | (.01) | (.01) | (.01) | (.01) | (.01) | (.01) |
| Education | -.05** | -.00 | -.03 | -.06** | -.01 | -.05* |
|  | (.02) | (.01) | (.02) | (.02) | (.02) | (.02) |
| ***Constant*** | .13** | -.18** | .14** | .16** | -.15** | .22** |
|  | (.04) | (.04) | (.05) | (.04) | (.04) | (.05) |
| N | 1366 | 1329 | 1567 | 1366 | 1329 | 1567 |
| Adj-R2 | .41 | .53 | .32 | .39 | .51 | .27 |

| **Note:** *p<.05, **p<.01. Entries are OLS coefficients with standard errors in parentheses.  Model 2 is reported in the main text (Table 1). Model 3 substitutes the 5-item index of  Opposition to Liberal Democracy for the 7-item index. All variables coded to 0 to 1 scale. |
| --- |

1. As noted in the text (Footnote 10), the wording of the disqualification question was slightly different in Germany and Israel versus the US. In the first two countries, the question emphasized the government’s role in targeting candidates (“disqualify candidates whom the *government deems**to be disloyal”)*, while in the US, people were asked simply whether the President should be able to “disqualify candidates *who are disloyal* to the country,” since the Congress would be involved in deeming groups to be disloyal. If the US wording prompted people to think of a more “objectively” disloyal candidate and thus raised their support for backsliding on this question, we can surmise that the difference in support for disqualifying candidates across the US and the other two countries would be even greater if the question had been presented identically in the three countries. [↑](#footnote-ref-1)
2. For the US sample, 51.71% were assigned to the in-party treatment, and 48.29% assigned to the out-party treatment. [↑](#footnote-ref-2)
3. For the Israeli sample, 50.70% were assigned to the in-party treatment, and 49.30% assigned to the out-party treatment. [↑](#footnote-ref-3)
4. For the German survey, 48.32% were assigned to the in-party treatment, and 51.68% assigned to the out-party treatment. [↑](#footnote-ref-4)
